# Supplementary material for: Prevalence of posttraumatic stress disorder in orthopedic trauma patients and a call to implement the Injured Trauma Survivor Screen as a prospective screening protocol in the United States
Source: PubMed Central journal article supplement — J Trauma Inj. 2024 Feb 23;37(1):67–73. doi: 10.20408/jti.2023.0068 (PMC11309223; doi:10.20408/jti.2023.0068), 2024-02-23
Supplement: jti-2023-0068-Supplementary-Table-1.pdf [file jti-2023-0068-Supplementary-Table-1.pdf]

**Material S1.** PTSD checklist for DSM-5 (PCL-5) survey. Below is a list of problems people sometimes have after a stressful experience. Please indicate how much you have been bothered by that problem in the past month.

| Question                                                                                                                             | Not at all | A little | Moderately | Quite a bit | Extremely |
|--------------------------------------------------------------------------------------------------------------------------------------|------------|----------|------------|-------------|-----------|
| 1. Repeated, disturbing and unwanted memories of the stressful experience                                                            |            |          |            |             |           |
| 2. Repeated, disturbing dreams of the stressful experience                                                                           |            |          |            |             |           |
| 3. Suddenly feeling or acting as if the stressful experience were actually happening again (as if you were reliving it)              |            |          |            |             |           |
| 4. Feeling very upset when something reminded you of the stressful experience                                                        |            |          |            |             |           |
| 5. Having strong physical reactions when something reminded you of the stressful experience (heart pounding or sweating)             |            |          |            |             |           |
| 6. Avoiding memories, thoughts, or feelings related to the stressful experience                                                      |            |          |            |             |           |
| 7. Avoiding external reminders of the stressful experience (people, places, objects, situations)                                     |            |          |            |             |           |
| 8. Trouble remembering important parts of the stressful experience                                                                   |            |          |            |             |           |
| 9. Having strong negative feelings about yourself, other people, or the world (for example: something is wrong with me or the world) |            |          |            |             |           |
| 10. Blaming yourself or someone else for the stressful experience or what happened after it                                          |            |          |            |             |           |
| 11. Having strong negative feelings such as fear, horror, anger, guilt, or shame                                                     |            |          |            |             |           |
| 12. Loss of interest in activities that you used to enjoy                                                                            |            |          |            |             |           |
| 13. Feelings distant or cut off from other people                                                                                    |            |          |            |             |           |
| 14. Trouble experiencing positive feelings (for example: unable to be happy or loving for people close to you)                       |            |          |            |             |           |
| 15. Irritable behavior, angry outbursts or acting aggressively                                                                       |            |          |            |             |           |
| 16. Taking too many risks or doing things that could cause you harm                                                                  |            |          |            |             |           |
| 17. Being super-alert or watchful or on guard                                                                                        |            |          |            |             |           |
| 18. Feeling jumpy or easily startled                                                                                                 |            |          |            |             |           |
| 19. Having difficulty concentrating                                                                                                  |            |          |            |             |           |
| 20. Trouble falling or staying asleep                                                                                                |            |          |            |             |           |

Scoring is achieved by giving a value of 1 through 5 based on the column of each response: 1 = not at all, and 5 = extremely. PTSD, posttraumatic stress disorder
