# Supplementary material for: Prevalence of posttraumatic stress disorder in orthopedic trauma patients and a call to implement the Injured Trauma Survivor Screen as a prospective screening protocol in the United States
Source: PubMed Central journal article supplement — J Trauma Inj. 2024 Feb 23;37(1):67–73. doi: 10.20408/jti.2023.0068 (PMC11309223; doi:10.20408/jti.2023.0068), 2024-02-23
Supplement: jti-2023-0068-Supplementary-Table-2.pdf [file jti-2023-0068-Supplementary-Table-2.pdf]

### Injured Trauma Survivor Screen (ITSS)

1 = Yes 0 = No

| <b>Before this injury</b>                                                                                                                                               | PTSD  | DEP |
|-------------------------------------------------------------------------------------------------------------------------------------------------------------------------|-------|-----|
| 1. Have you ever taken medication for, or been given a mental health diagnosis?                                                                                         |       | 1 0 |
| 2. Has there ever been a time in your life you have been bothered by feeling down or hopeless or lost all interest in things you usually enjoyed for more than 2 weeks? |       | 1 0 |
| <b>When you were injured or right afterward</b>                                                                                                                         |       |     |
| 3. Did you think you were going to die?                                                                                                                                 | 1 0   | 1 0 |
| 4. Do you think this was done to you intentionally?                                                                                                                     | 1 0   |     |
| <b>Since your injury</b>                                                                                                                                                |       |     |
| 5. Have you felt emotionally detached from your loved ones?                                                                                                             |       | 1 0 |
| 6. Do you find yourself crying and are unsure why?                                                                                                                      |       | 1 0 |
| 7. Have you felt more restless, tense or jumpy than usual?                                                                                                              | 1 0   |     |
| 8. Have you found yourself unable to stop worrying?                                                                                                                     | 1 0   |     |
| 9. Do you find yourself thinking that the world is unsafe and that people are not to be trusted?                                                                        | 1 0   |     |
| ≥ 2 is positive for PTSD risk                                                                                                                                           |       |     |
| ≥ 2 is positive for Depression risk                                                                                                                                     | SUM = |     |

**Material S2.** Injured Trauma Survivor Screen (ITSS). PTSD, posttraumatic stress disorder; DEP, depression.
